# Supplementary material for: Magneto-Fluorescent Mesoporous Nanocarriers for the Dual-Delivery of Ofloxacin and Doxorubicin to Tackle Opportunistic Bacterial Infections in Colorectal Cancer
Source: MDPI journal article supplement (doi:10.3390/ijms232012287), 2022-10-14
Supplement: s1 [file s1]

# Magneto-Fluorescent Mesoporous Nanocarriers to Tackle Opportunistic Bacterial Infections in Colorectal Cancer

Gonalo A. Marcelo <sup>1</sup>, Joana Galhano <sup>1</sup>, Tiago T. Robalo <sup>2</sup>, Maria Margarida Cruz <sup>2</sup>, Mar  a D. Marcos

<sup>3,4,5</sup>, Ram  n Mart  nez-M    ez <sup>3,4,5</sup>, Maria Paula Duarte <sup>6</sup>, Jos   Luis Capelo-Mart  nez <sup>1,7</sup>, Carlos Lodeiro\*

<sup>1,7</sup>, Elisabete Oliveira\* <sup>1,7</sup>

<sup>1</sup> BIOSCOPE Group, LAQV@REQUIMTE, Chemistry Department, FCT NOVA, Caparica (Portugal)

<sup>2</sup> BioISI-Instituto de Biosistemas e Ci  ncias Integrativas,, Faculdade de Ci  ncias, Universidade de Lisboa, 1749-016 Lisboa (Portugal)

<sup>3</sup> Instituto Interuniversitario de Investigaci  n de Reconocimiento Molecular y Desarrollo Tecnol  gico, Universitat Polit  cnica de Val  ncia, Universitat de Val  ncia, Valencia (Spain)

<sup>4</sup> Unidad Mixta UPV-CIPF de Investigaci  n en Mecanismos de Enfermedades y Nanomedicina, Val  ncia, Universitat Polit  cnica de Val  ncia, Centro de Investigaci  n Pr  ncipe Felipe, Val  ncia (Spain)

<sup>5</sup> CIBER de Bioingenier  a, Biomateriales y Nanomedicina (CIBER-BBN) (Spain)

<sup>6</sup> MEtRICs/DCTB, FCT NOVA, Caparica (Portugal)

<sup>7</sup> PROTEOMASS Scientific Society, Rua dos Inventores. Madam Parque, Caparica Campus, Caparica (Portugal)

\* Correspondence: cle@fct.unl.pt (C.L.E.); ej.oliveira@fct.unl.pt (E.O.)

## Tables

**Table S1.** Reaction conditions for the loading assays of NANO2-COOH with DOX, OFLO and a combination of both.

|                   | <b>m<sub>NANO2</sub> (mg)</b> | <b>V<sub>drug stock</sub> (mL)</b> | <b>V<sub>solvent</sub> (mL)</b> | <b>V<sub>total</sub> (mL)</b> |
|-------------------|-------------------------------|------------------------------------|---------------------------------|-------------------------------|
| <b>OFLO</b>       | 20                            | 3.2 <sup>1</sup>                   | 3.2 (miliQ H <sub>2</sub> O)    | 6.4                           |
| <b>DOX</b>        | 20                            | 3.2 <sup>2</sup>                   | 3.2 (PBS 0.01M)                 | 6.4                           |
| <b>DOX + OFLO</b> | 20                            | 3.2 + 3.2                          | -                               | 6.4                           |

<sup>1</sup> OFLO stock (2 mg/mL) prepared in miliQ H<sub>2</sub>O

<sup>2</sup> DOX stock (2 mg/mL) prepared in PBS 0.01M (pH 7.0)

**Table S2.** Korsmeyer-Peppas calculated parameters for all pH related assays.

|       | pH 7.4     |             |            |             | pH 5.0     |             |            |             |
|-------|------------|-------------|------------|-------------|------------|-------------|------------|-------------|
|       | NANO3@D    | NANO3@O     | NANO3@DO   | NANO3@DO    | NANO3@D    | NANO3@O     | NANO3@DO   | NANO3@DO    |
|       | <i>DOX</i> | <i>OFLO</i> | <i>DOX</i> | <i>OFLO</i> | <i>DOX</i> | <i>OFLO</i> | <i>DOX</i> | <i>OFLO</i> |
| $K_m$ | 0.681      | 0.043       | 0.006      | 0.058       | 0.007      | 0.040       | 0.012      | 0.071       |
| $n$   | 0.25       | 0.33        | 0.17       | 0.30        | 0.21       | 0.25        | 0.32       | 0.26        |

## Figures

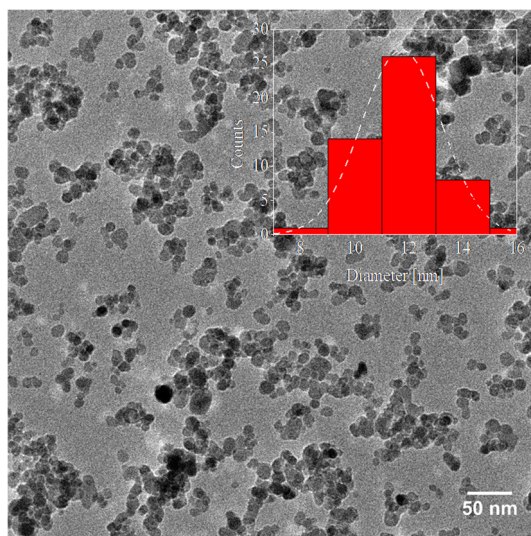

**Figure S1.** TEM micrograph of as-synthesized NANO1; *inset*: particle size distribution, with  $d = 11.73 \pm 1.47$  nm ( $n = 50$ ). Scale bar of 50 nm.

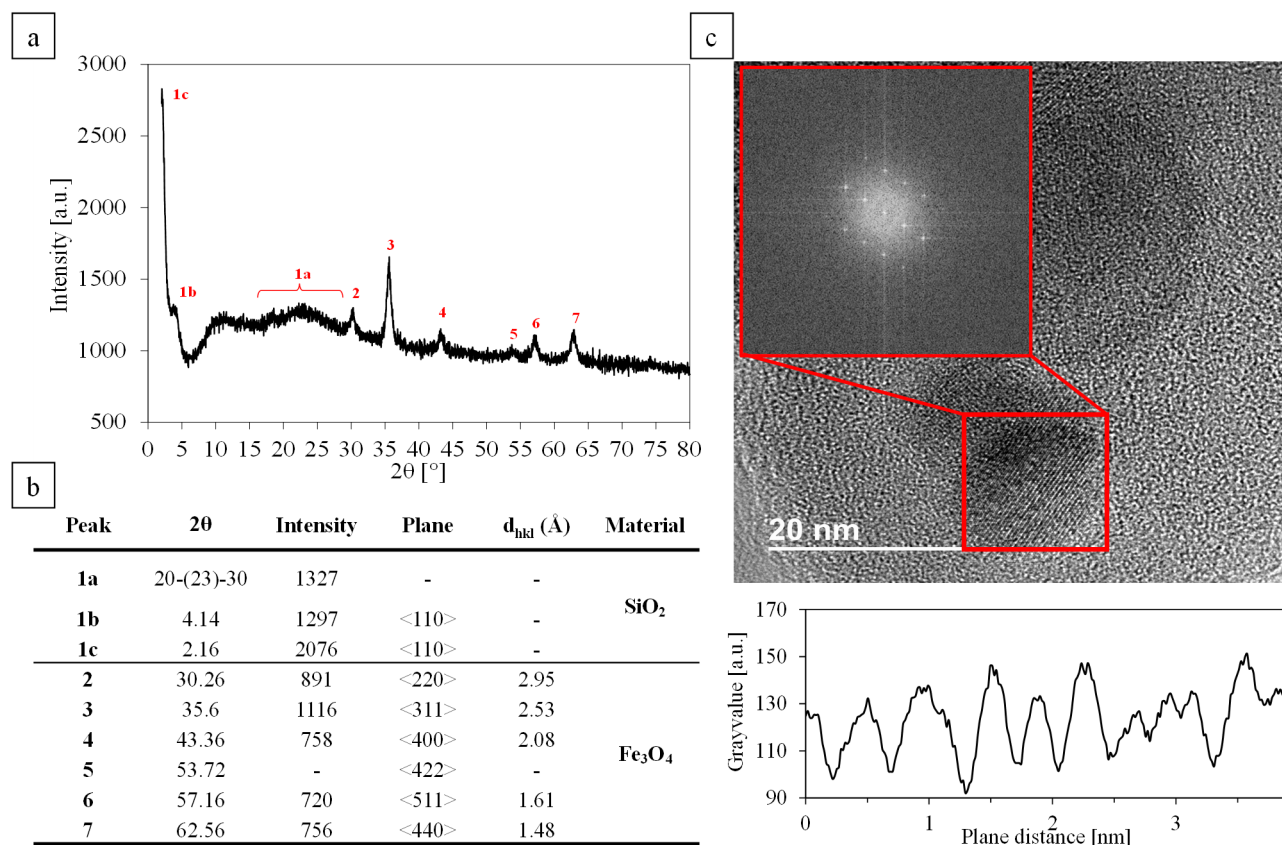

**Figure S2.** XRD spectrum of NANO2 (a), and 2θ peaks' information and attribution to silica (SiO<sub>2</sub>) and magnetite (Fe<sub>3</sub>O<sub>4</sub>) *hkl* lattice distances (b). TEM micrograph NANO2 and respective ImageJ generated FFT measurement of the core lattice *d*-spacing of 2.50 Å, assigned to the <311> plane of Fe<sub>3</sub>O<sub>4</sub>; assessment via grayscale profile plot, by counting the cycles (10) and dividing by total distance (4 nm)<sup>85</sup>(c).

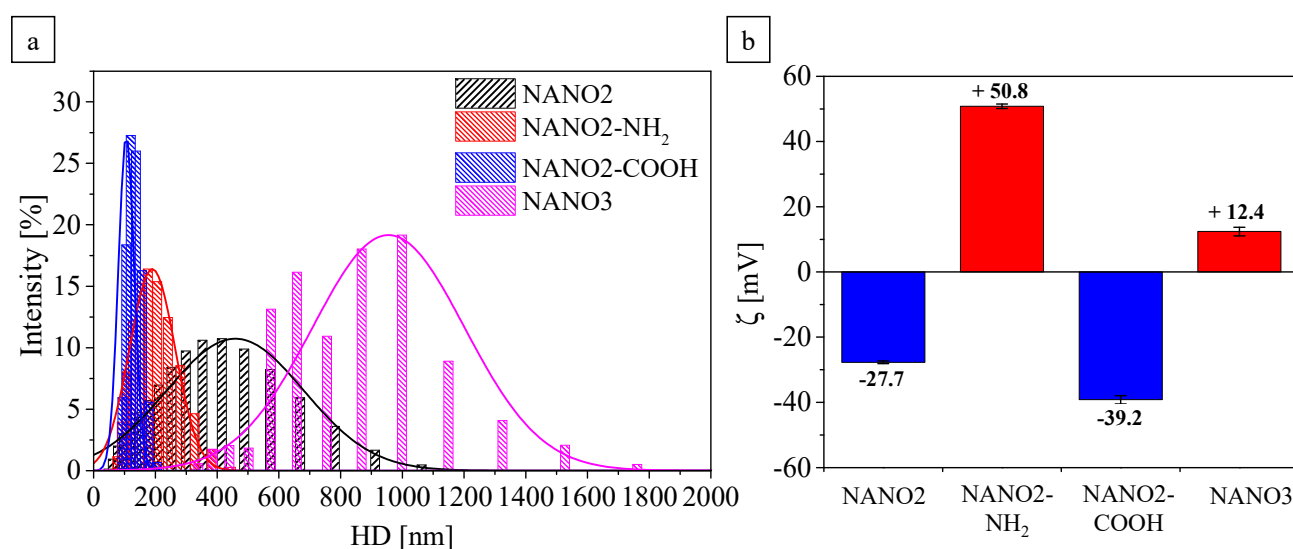

**Figure S3.** DLS intensity-determined average hydrodynamic diameter (HD) of each synthetic product (a), and correspondent average zeta potential (ζ).

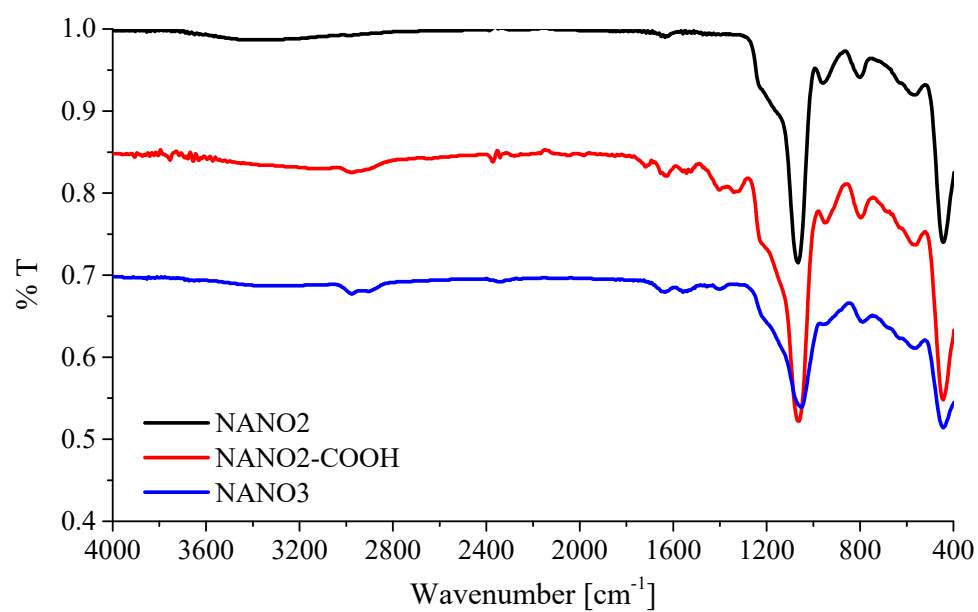

**Figure S4.** ATR-FTIR spectra of as-synthesized NANO2, NANO2-COOH and NANO3.

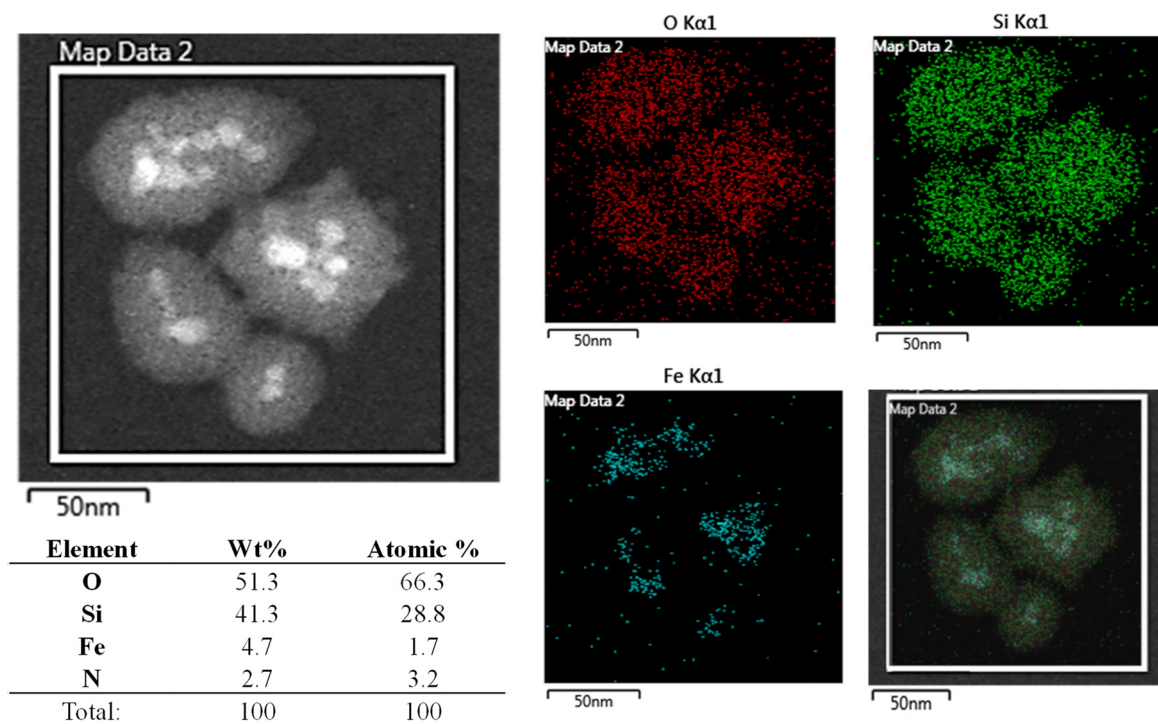

**Figure S5.** Dark-field STEM image of NANO3 and respective elemental analysis and distribution.

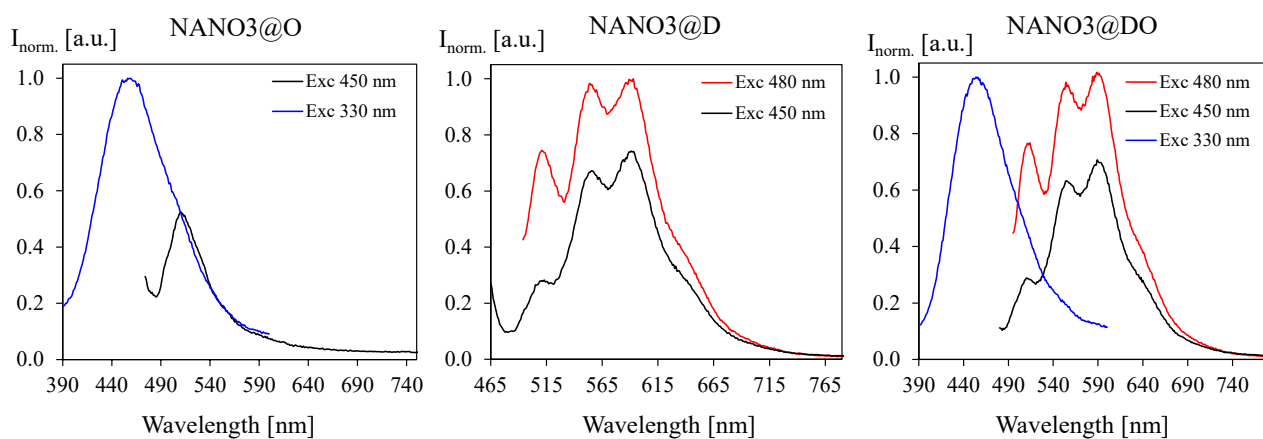

**Figure S6.** Fluorescence spectra of conjugated SiQD, DOX and OFLO in NANO3@O, NANO3@D and NANO3@DO systems.

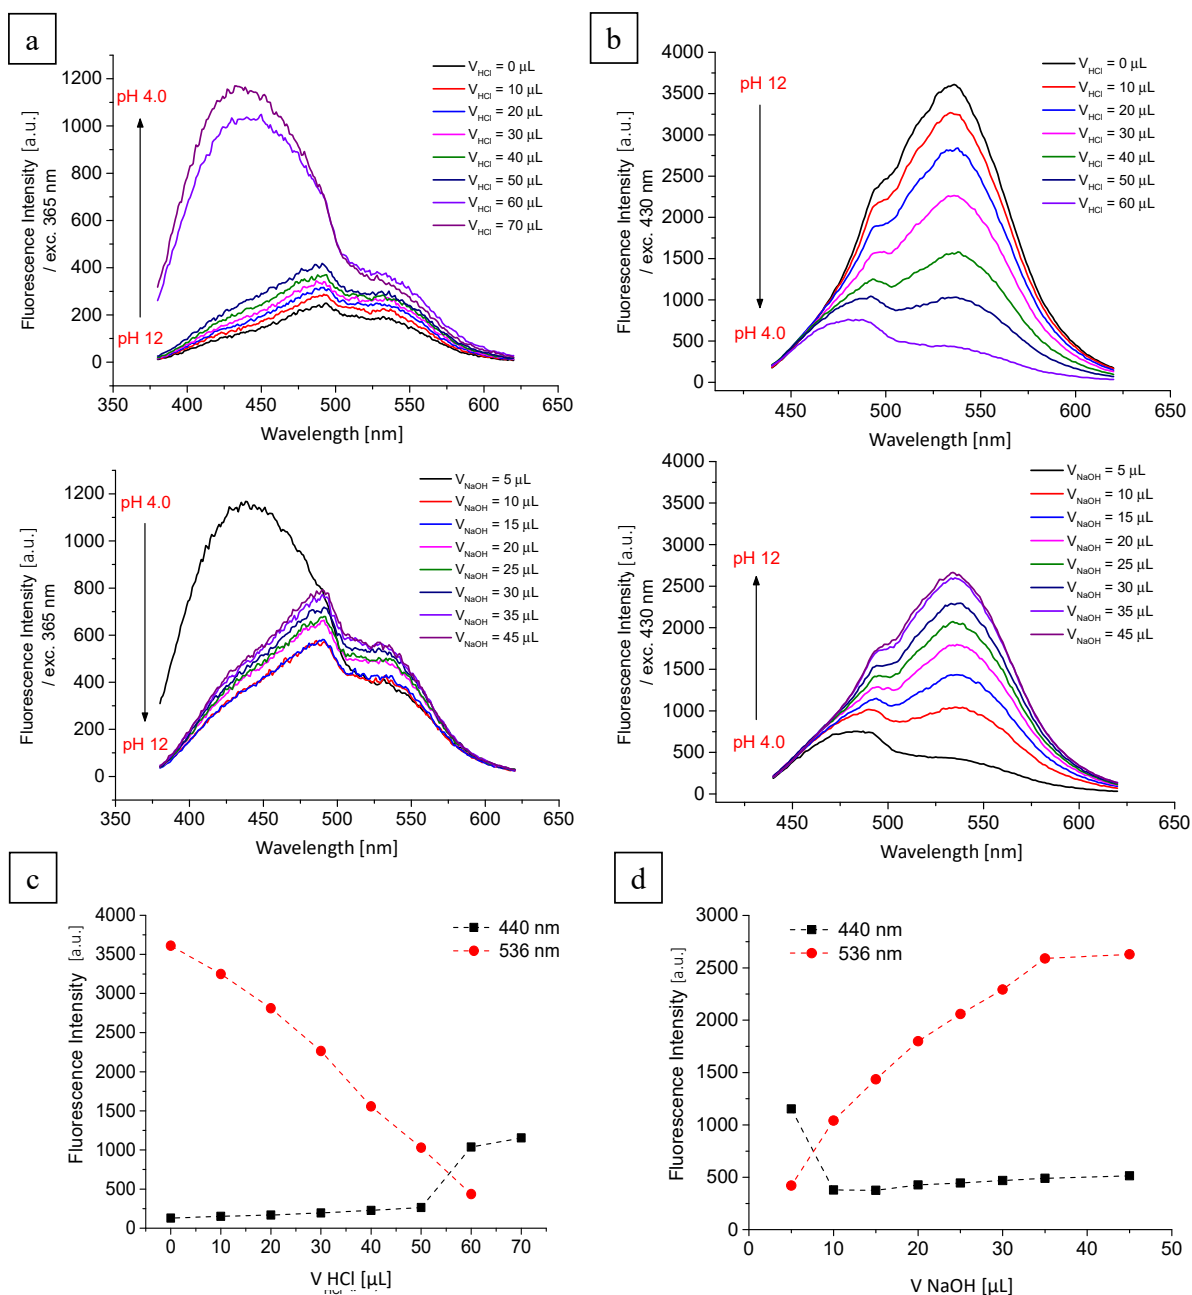

**Figure S7.** SiQD fluorescence spectra variations by sequential addition of HCl and NaOH 10 and 5  $\mu\text{L}$ , respectively, after excitation at 365 nm (a) and 430 nm (b). Emission maxima (440 and 536 nm) variations with HCl (c) and NaOH (d) added volumes.

85. ImageJ, FFT Measurements, <https://imagej.nih.gov/ij/docs/examples/tem/>, (accessed 29/03/2022, 2022).
